# Supplementary material for: MetaMLP: A fast word embedding based classifier to profile target gene databases in metagenomic samples
Source: bioRxiv or medRxiv preprint supplement (doi:10.1101/569970), 2019-03-06
Supplement: Supplementary file [file media-1.pdf]

# MetaMLP: A fast word embedding based classifier to profile target gene databases in metagenomic samples

G. A. Arango-Argoty<sup>1</sup>, L. S. Heath<sup>1</sup>, A. Pruden<sup>2</sup>, P. Vikesland<sup>2</sup>, and L. Zhang<sup>1\*</sup>

<sup>1</sup>Department of Computer Science, Virginia Tech, Blacksburg, VA, USA

<sup>2</sup>Department of Civil and Environmental Engineering, Virginia Tech, Blacksburg, VA, USA

\* Corresponding author (lqzhang@vt.edu)

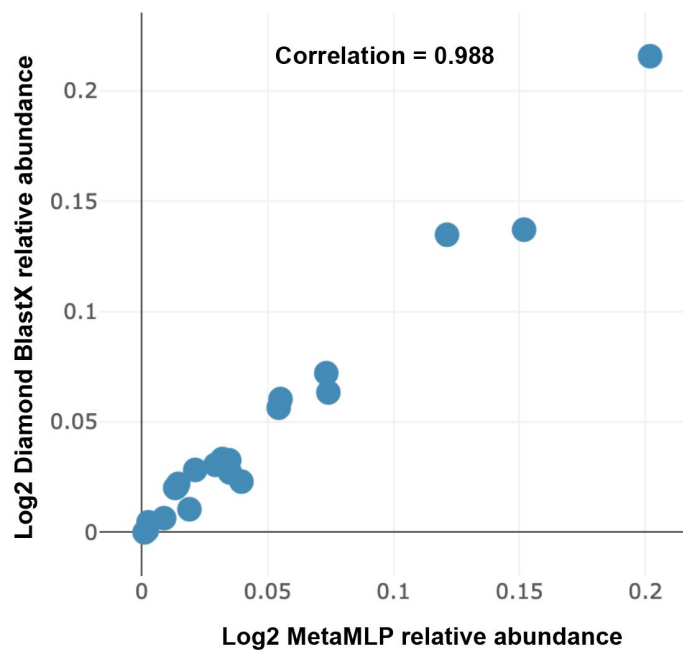

**Supplementary Figure S1:** Correlation between pathway relative abundances computed from results from MetaMLP (x axis) and Diamond BlastX (y axis) using the true positive dataset.

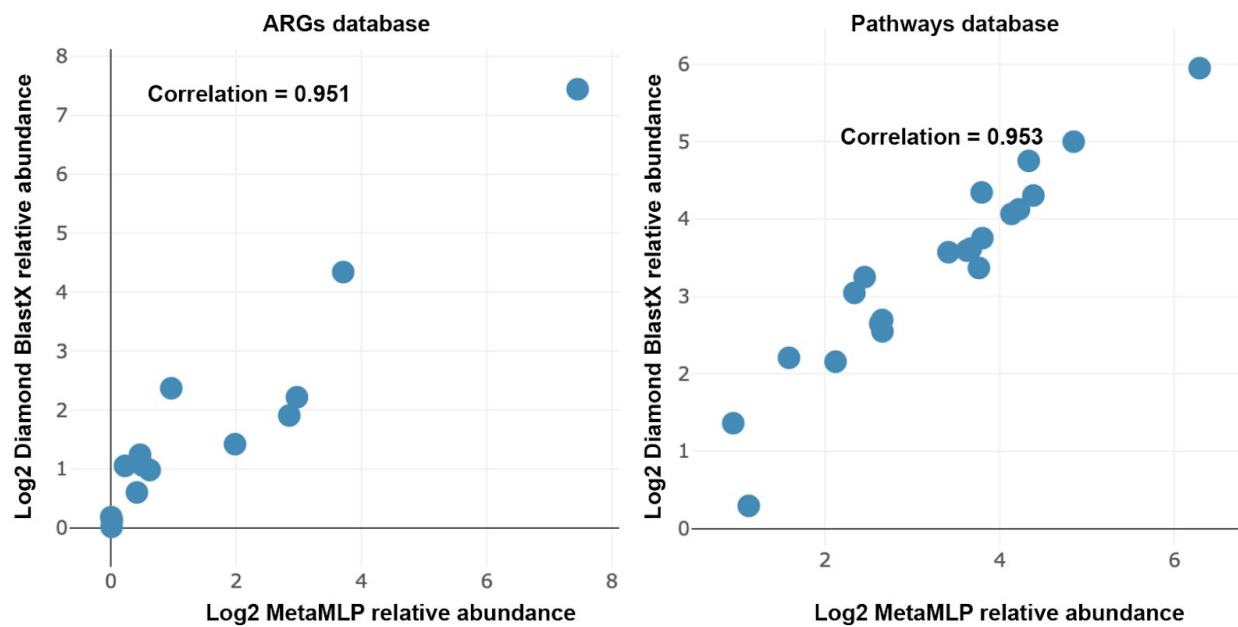

**Supplementary Figure S2:** Correlation between MetaMLP and Diamond BlastX relative abundance results from the 100 Million dataset obtained from a real soil sample.

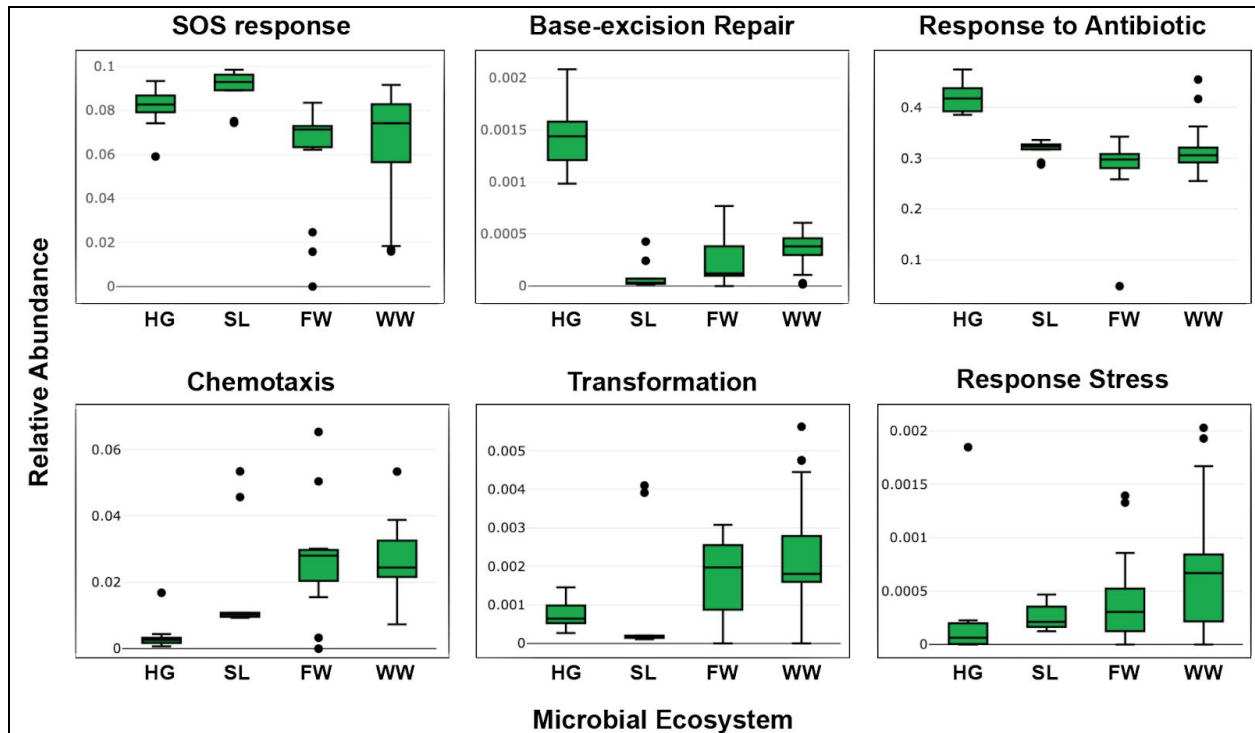

**Supplementary Figure S3:** Relative abundance of biological process from the GO response to stress database.

| Pathway                             | Training Proteins | Validation Genes | Validation Reads |
|-------------------------------------|-------------------|------------------|------------------|
| Amino-acid_biosynthesis             | 501               | 126              | 7148             |
| Amino-acid_degradation              | 99                | 25               | 1422             |
| Antibiotic_biosynthesis             | 82                | 20               | 1121             |
| Aromatic_compound_metabolism        | 68                | 17               | 890              |
| Bacterial_outer_membrane_biogenesis | 62                | 16               | 901              |
| Carbohydrate_biosynthesis           | 79                | 20               | 1071             |
| Carbohydrate_degradation            | 167               | 42               | 2199             |
| Carbohydrate_metabolism             | 138               | 35               | 1903             |
| Cell_wall_biogenesis                | 190               | 48               | 2642             |
| Cofactor_biosynthesis               | 344               | 86               | 5082             |
| Isoprenoid_biosynthesis             | 42                | 10               | 651              |
| Lipid_metabolism                    | 177               | 45               | 2569             |

|                                          |     |    |      |
|------------------------------------------|-----|----|------|
| Metabolic_intermediate_biosynthesis      | 95  | 24 | 1379 |
| Nitrogen_metabolism                      | 50  | 12 | 709  |
| Nucleotide-sugar_biosynthesis            | 42  | 10 | 505  |
| One-carbon_metabolism                    | 45  | 11 | 588  |
| Porphyrin-containing_compound_metabolism | 66  | 16 | 713  |
| Protein_modification                     | 46  | 12 | 663  |
| Purine_metabolism                        | 133 | 33 | 1720 |
| Pyrimidine_metabolism                    | 105 | 26 | 1397 |
| Xenobiotic_degradation                   | 41  | 10 | 478  |

**Supplementary Table S1:** UniProt pathway database with number of proteins used for training, number of genes used for validation and the simulated number of reads for each pathway category.

| <b>Antibiotic Class</b> | <b>Proteins</b> |
|-------------------------|-----------------|
| multidrug               | 4456            |
| beta-lactam             | 2885            |
| MLS                     | 1710            |
| tetracycline            | 557             |
| fosfomicin              | 434             |
| aminoglycoside          | 403             |
| glycopeptide            | 346             |
| unclassified            | 311             |
| bacitracin              | 280             |
| polymyxin               | 245             |
| fluoroquinolone         | 158             |
| phenicol                | 157             |
| sulfonamide             | 125             |
| diaminopyrimidine       | 80              |

**Supplementary Table S2:** Antibiotic resistance categories from ARGminer

| <b>GO Term</b> | <b>Biological Process</b>                                                  | <b>Proteins</b> |
|----------------|----------------------------------------------------------------------------|-----------------|
| GO:0006935     | chemotaxis                                                                 | 312             |
| GO:0006515     | protein_quality_control_for_misfolded_or_incompletely_synthesized_proteins | 123             |
| GO:0006298     | mismatch_repair                                                            | 1306            |
| GO:0042742     | defense_response_to_bacterium                                              | 136             |
| GO:0046677     | response_to_antibiotic                                                     | 975             |
| GO:0009432     | SOS_response                                                               | 1030            |
| GO:0006814     | sodium_ion_transport                                                       | 125             |
| GO:0051607     | defense_response_to_virus                                                  | 149             |
| GO:0051775     | response_to_redox_state                                                    | 164             |
| GO:0045454     | cell_redox_homeostasis                                                     | 164             |
| GO:0009236     | cobalamin_biosynthetic_process                                             | 505             |
| GO:0045910     | negative_regulation_of_DNA_recombination                                   | 150             |
| GO:0006281     | DNA_repair                                                                 | 3450            |
| GO:0006261     | DNA-dependent_DNA_replication                                              | 228             |
| GO:0006289     | nucleotide-excision_repair                                                 | 1485            |
| GO:0010038     | response_to_metal_ion                                                      | 123             |
| GO:0009163     | nucleoside_biosynthetic_process                                            | 204             |
| GO:0006541     | glutamine_metabolic_process                                                | 258             |
| GO:0030091     | protein_repair                                                             | 186             |
| GO:0034605     | cellular_response_to_heat                                                  | 128             |
| GO:0019835     | cytolysis                                                                  | 140             |
| GO:0006355     | regulation_of_transcription,_DNA-templated                                 | 360             |
| GO:0019380     | 3-phenylpropionate_catabolic_process                                       | 224             |
| GO:0045892     | negative_regulation_of_transcription,_DNA-templated                        | 203             |
| GO:0000724     | double-strand_break_repair_via_homologous_recombination                    | 296             |
| GO:0000160     | phosphorelay_signal_transduction_system                                    | 449             |
| GO:0006979     | response_to_oxidative_stress                                               | 677             |
| GO:0006310     | DNA_recombination                                                          | 1766            |
| GO:0043571     | maintenance_of_CRISPR_repeat_elements                                      | 101             |
| GO:0009307     | DNA_restriction-modification_system                                        | 283             |

|            |                                              |      |
|------------|----------------------------------------------|------|
| GO:0006284 | base-excision_repair                         | 1097 |
| GO:0006974 | cellular_response_to_DNA_damage_stimulus     | 118  |
| GO:0042744 | hydrogen_peroxide_catabolic_process          | 371  |
| GO:0005975 | carbohydrate_metabolic_process               | 131  |
| GO:0006260 | DNA_replication                              | 958  |
| GO:0009636 | response_to_toxic_substance                  | 149  |
| GO:0009405 | pathogenesis                                 | 116  |
| GO:0006811 | ion_transport                                | 102  |
| GO:0006109 | regulation_of_carbohydrate_metabolic_process | 214  |

**Supplementary Table S3:** Database of response to stress associated categories using Gene Ontology terms.

| Pathway                                  | Precision | Recall | F1 Score |
|------------------------------------------|-----------|--------|----------|
| Amino-acid_biosynthesis                  | 0.99      | 0.99   | 0.99     |
| Amino-acid_degradation                   | 0.97      | 0.97   | 0.97     |
| Antibiotic_biosynthesis                  | 0.93      | 0.82   | 0.87     |
| Aromatic_compound_metabolism             | 0.42      | 0.44   | 0.43     |
| Bacterial_outer_membrane_biogenesis      | 1         | 0.36   | 0.53     |
| Carbohydrate_biosynthesis                | 0.97      | 1      | 0.98     |
| Carbohydrate_degradation                 | 0.99      | 0.99   | 0.99     |
| Carbohydrate_metabolism                  | 0.97      | 0.97   | 0.97     |
| Cell_wall_biogenesis                     | 0.99      | 1      | 0.99     |
| Cofactor_biosynthesis                    | 0.99      | 0.99   | 0.99     |
| Isoprenoid_biosynthesis                  | 1         | 0.99   | 0.99     |
| Lipid_metabolism                         | 0.98      | 1      | 0.99     |
| Metabolic_intermediate_biosynthesis      | 0.97      | 0.97   | 0.97     |
| Nitrogen_metabolism                      | 1         | 1      | 1        |
| Nucleotide-sugar_biosynthesis            | 1         | 0.99   | 1        |
| One-carbon_metabolism                    | 0.99      | 0.95   | 0.97     |
| Porphyrin-containing_compound_metabolism | 0.99      | 0.97   | 0.98     |
| Protein_modification                     | 1         | 1      | 1        |
| Purine_metabolism                        | 1         | 0.99   | 0.99     |

|                        |             |             |             |
|------------------------|-------------|-------------|-------------|
| Pyrimidine_metabolism  | 0.99        | 1           | 1           |
| Xenobiotic_degradation | 0.8         | 0.46        | 0.59        |
|                        |             |             |             |
| <b>Average</b>         | <b>0.99</b> | <b>0.99</b> | <b>0.99</b> |

**Supplementary Table S5:** Prediction performance of MetaMLP.

| <b>Pathway</b>                           | <b>Precision</b> | <b>Recall</b> | <b>F1 Score</b> |
|------------------------------------------|------------------|---------------|-----------------|
| Amino-acid_biosynthesis                  | 1                | 1             | 1               |
| Amino-acid_degradation                   | 0.94             | 1             | 0.97            |
| Antibiotic_biosynthesis                  | 1                | 0.97          | 0.98            |
| Aromatic_compound_metabolism             | 0.78             | 1             | 0.87            |
| Bacterial_outer_membrane_biogenesis      | 0                | 0             | 0               |
| Carbohydrate_biosynthesis                | 1                | 0.98          | 0.99            |
| Carbohydrate_degradation                 | 1                | 1             | 1               |
| Carbohydrate_metabolism                  | 0.97             | 1             | 0.99            |
| Cell_wall_biogenesis                     | 1                | 1             | 1               |
| Cofactor_biosynthesis                    | 1                | 1             | 1               |
| Isoprenoid_biosynthesis                  | 1                | 1             | 1               |
| Lipid_metabolism                         | 1                | 1             | 1               |
| Metabolic_intermediate_biosynthesis      | 1                | 1             | 1               |
| Nitrogen_metabolism                      | 1                | 1             | 1               |
| Nucleotide-sugar_biosynthesis            | 1                | 1             | 1               |
| One-carbon_metabolism                    | 1                | 1             | 1               |
| Porphyrin-containing_compound_metabolism | 1                | 1             | 1               |
| Protein_modification                     | 1                | 1             | 1               |
| Purine_metabolism                        | 1                | 1             | 1               |
| Pyrimidine_metabolism                    | 1                | 1             | 1               |
| Xenobiotic_degradation                   | 1                | 0.47          | 0.64            |
|                                          |                  |               |                 |
| <b>Average</b>                           | <b>0.99</b>      | <b>1</b>      | <b>1</b>        |

**Supplementary Table S6:** Prediction performance of the best hit approach using diamond blastx.
