# Supplementary material for: MetaMLP: A fast word embedding based classifier to profile target gene databases in metagenomic samples
Source: bioRxiv or medRxiv preprint supplement (doi:10.1101/569970), 2019-03-06
Supplement: Supplementary file [file media-2.pdf]

|            |           |                                     |           |                                  |           |          |          |             |     |             |
|------------|-----------|-------------------------------------|-----------|----------------------------------|-----------|----------|----------|-------------|-----|-------------|
| wastewater | ERX656378 | Illumina HiSeq 2(AALBORG UNIVERSITY | ERP009124 | Metagenomes of Danish EBPR WWTPs | ERS632915 | 16305.99 | 89347369 | 26804210700 | WGS | METAGENOMIC |
| wastewater | ERX656397 | Illumina HiSeq 2(AALBORG UNIVERSITY | ERP009124 | Metagenomes of Danish EBPR WWTPs | ERS632927 | 16528.92 | 86815483 | 26044644900 | WGS | METAGENOMIC |
| wastewater | ERX656396 | Illumina HiSeq 2(AALBORG UNIVERSITY | ERP009124 | Metagenomes of Danish EBPR WWTPs | ERS632926 | 19568.24 | 98562152 | 29568645600 | WGS | METAGENOMIC |
